# Supplementary material for: Cluster and Fold Stability of E. coli ISC-Type Ferredoxin
Source: PubMed Central journal article supplement (PMC3827102; doi:10.1371/journal.pone.0078948), 2013-11-12

## Supplementary Materials

**Figure S1.** Elution profile of holo-Fdx on a 16/60 Superdex G75 column.  $A_{280}$  and  $A_{458}$  profiles are shown in blue and red respectively. Holo-Fdx eluted at 87 ml as indicated by the increase in  $A_{458}$  which represents the [2Fe-2S] cluster. Apo-Fdx elutes at 76 ml as determined by SDS-PAGE and NMR analysis.

Figure S1

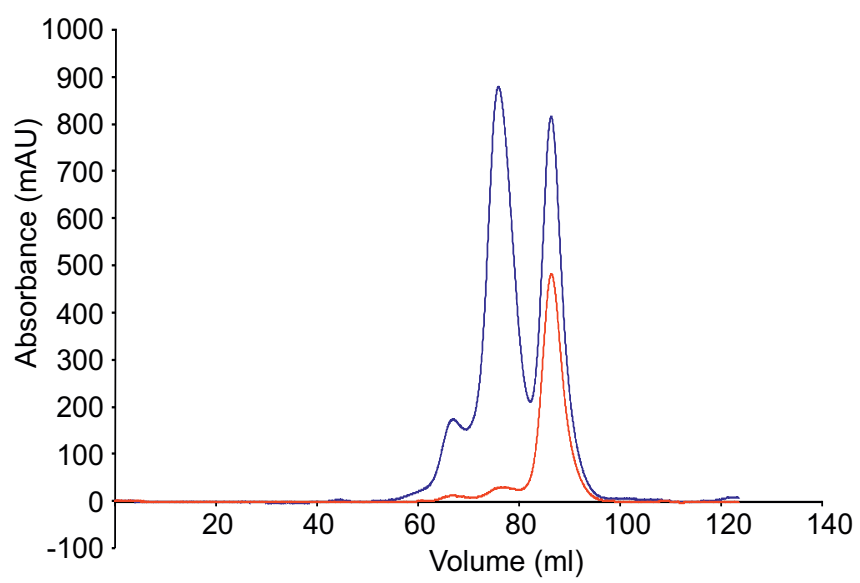

Supplement: pone.0078948.s001.pdf [file pone.0078948.s001.pdf]
